# Supplementary material for: Short-term Associations between Fine and Coarse Particulate Matter and Hospitalizations in Southern Europe: Results from the MED-PARTICLES Project
Source: PubMed Central journal article supplement (PMC3764077; doi:10.1289/ehp.1206151), 2013-06-18
Supplement: ehp.1206151.s001.pdf [file ehp.1206151.s001.pdf]

## **Supplemental Material**

# **Short-term Associations between Fine and Coarse Particulate Matter and Hospitalizations in Southern Europe: Results from the MED-PARTICLES Project**

Massimo Stafoggia, Evangelia Samoli, Ester Alessandrini, Ennio Cadum, Bart Ostro, Giovanna Berti, Annunziata Faustini, Benedicte Jacquemin, Cristina Linares, Mathilde Pascal, Giorgia Randi, Andrea Ranzi, Elisa Stivanello, and Francesco Forastiere; the MED-PARTICLES Study Group.

### **Table of Contents**

|           |        |
|-----------|--------|
| Table S1  | Page 2 |
| Table S2  | Page 3 |
| Figure S1 | Page 4 |
| Figure S2 | Page 5 |

**Table S1.** Environmental variables. Daily values of particulate matter concentrations, gases and air temperature in the 8 cities of MED-PARTICLES

| City <sup>a</sup>     | Study period | PM <sub>2.5</sub> (µg/m <sup>3</sup> ) |                    | PM <sub>2.5-10</sub> (µg/m <sup>3</sup> ) |                    | PM <sub>10</sub> (µg/m <sup>3</sup> ) |                    | NO <sub>2</sub> (µg/m <sup>3</sup> ) | O <sub>3</sub> (April-September) (µg/m <sup>3</sup> ) | Air temperature (°C) |
|-----------------------|--------------|----------------------------------------|--------------------|-------------------------------------------|--------------------|---------------------------------------|--------------------|--------------------------------------|-------------------------------------------------------|----------------------|
|                       |              | Days (n)                               | mean ± SD (IQR)    | Days (n)                                  | mean ± SD (IQR)    | Days (n)                              | mean ± SD (IQR)    | mean ± SD                            | mean ± SD                                             | mean ± SD            |
| <b>Milan</b>          | 2006-2010    | 1,638                                  | 32.9 ± 27.1 (31.7) | 1,637                                     | 14.8 ± 11.5 (11.9) | 1,825                                 | 46.9 ± 34.3 (36.6) | 60.0 ± 23.8                          | 94.5 ± 31.7                                           | 13.9 ± 8.3           |
| <b>Turin</b>          | 2006-2010    | 1,692                                  | 34.4 ± 28.3 (34.0) | -                                         | -                  | 1,622                                 | 48.1 ± 36.4 (44.0) | 59.8 ± 25.2                          | 106.9 ± 30.9                                          | 12.7 ± 8.0           |
| <b>Emilia Romagna</b> | 2008-2010    | 1,093                                  | 21.6 ± 14.9 (15.3) | 1,093                                     | 12.6 ± 6.7 (7.7)   | 1,096                                 | 34.3 ± 19.3 (21.3) | 43.3 ± 15.8                          | 104.1 ± 28.7                                          | 14.6 ± 8.6           |
| <b>Bologna</b>        | 2006-2010    | 1,767                                  | 25.8 ± 18.5 (18.0) | -                                         | -                  | 1,729                                 | 38.4 ± 21.6 (24.0) | 50.1 ± 18.2                          | 93.2 ± 31.5                                           | 14.7 ± 8.6           |
| <b>Marseille</b>      | 2001-2003    | 1,085                                  | 18.6 ± 8.0 (11.2)  | 840                                       | 9.3 ± 4.3 (6.0)    | 1,060                                 | 26.7 ± 10.0 (14.0) | 49.9 ± 15.3                          | 108.2 ± 25.7                                          | 15.8 ± 7.1           |
| <b>Rome</b>           | 2006-2010    | 1,818                                  | 19.6 ± 10.0 (11.1) | 1,816                                     | 13.2 ± 6.9 (8.2)   | 1,824                                 | 34.5 ± 14.1 (15.9) | 59.2 ± 16.9                          | 96.4 ± 21.7                                           | 15.9 ± 7.0           |
| <b>Barcelona</b>      | 2003-2010    | 2,676                                  | 23.7 ± 11.5 (12.9) | 2,669                                     | 12.8 ± 10.4 (12.9) | 2,669                                 | 36.5 ± 17.2 (20.4) | 40.1 ± 17.3                          | 79.7 ± 20.5                                           | 14.3 ± 6.3           |
| <b>Madrid</b>         | 2004-2009    | 1,685                                  | 17.2 ± 9.7 (11.2)  | 1,681                                     | 17.5 ± 11.9 (13.0) | 1,716                                 | 35.1 ± 20.1 (23.7) | 62.7 ± 26.6                          | 56.4 ± 15.1 <sup>b</sup>                              | 15.1 ± 7.7           |

<sup>a</sup> Cities are ordered by latitude, North to South

<sup>b</sup> Daily mean instead of daily maximum 8-hr running mean

**Table S2.** Environmental variables, by cold and warm season. Daily values of particulate matter concentrations in the 8 cities of MED-PARTICLES. The cold season is defined as October-March, the warm season is defined as April-September

| City/Season                          | PM <sub>2.5</sub> (µg/m <sup>3</sup> ) |                    | PM <sub>2.5-10</sub> (µg/m <sup>3</sup> ) |                    | PM <sub>10</sub> (µg/m <sup>3</sup> ) |                    |
|--------------------------------------|----------------------------------------|--------------------|-------------------------------------------|--------------------|---------------------------------------|--------------------|
|                                      | Days (n)                               | mean ± SD (IQR)    | Days (n)                                  | mean ± SD (IQR)    | Days (n)                              | mean ± SD (IQR)    |
| <b>Cold season (October-March)</b>   |                                        |                    |                                           |                    |                                       |                    |
| Milan                                | 836                                    | 48.3 ± 29.3 (40.0) | 835                                       | 17.5 ± 13.5 (15.4) | 910                                   | 65.4 ± 38.6 (49.1) |
| Turin                                | 858                                    | 51.3 ± 30.3 (43.0) | -                                         | -                  | 838                                   | 68.0 ± 39.8 (54.0) |
| Emilia Romagna                       | 544                                    | 29.6 ± 16.9 (22.2) | 544                                       | 14.1 ± 7.9 (10.6)  | 547                                   | 44.0 ± 21.8 (27.7) |
| Bologna                              | 887                                    | 34.8 ± 21.5 (24.9) | -                                         | -                  | 868                                   | 49.1 ± 24.4 (29.0) |
| Marseille                            | 538                                    | 19.5 ± 9.0 (13.0)  | 446                                       | 8.4 ± 3.7 (5.0)    | 530                                   | 26.8 ± 10.9 (14.0) |
| Rome                                 | 904                                    | 22.9 ± 11.9 (15.5) | 903                                       | 12.8 ± 7.2 (9.5)   | 910                                   | 37.7 ± 16.4 (22.3) |
| Barcelona                            | 1,287                                  | 25.7 ± 13.8 (16.0) | 1,280                                     | 11.7 ± 10.4 (10.7) | 1,280                                 | 37.3 ± 19.4 (22.7) |
| Madrid                               | 872                                    | 17.6 ± 10.3 (12.2) | 872                                       | 18.6 ± 13.8 (16.3) | 904                                   | 36.9 ± 22.8 (28.1) |
| <b>Warm season (April-September)</b> |                                        |                    |                                           |                    |                                       |                    |
| Milan                                | 802                                    | 16.8 ± 9.7 (10.2)  | 802                                       | 12.0 ± 7.9 (10.4)  | 915                                   | 28.4 ± 13.2 (15.9) |
| Turin                                | 834                                    | 17.0 ± 9.3 (12.0)  | -                                         | -                  | 784                                   | 26.9 ± 13.5 (15.0) |
| Emilia Romagna                       | 549                                    | 13.5 ± 5.6 (6.7)   | 549                                       | 11.1 ± 4.8 (5.3)   | 549                                   | 24.7 ± 9.0 (11.3)  |
| Bologna                              | 880                                    | 16.8 ± 7.8 (8.0)   | -                                         | -                  | 861                                   | 27.6 ± 10.2 (11.0) |
| Marseille                            | 547                                    | 17.7 ± 6.7 (10.1)  | 394                                       | 10.3 ± 4.7 (5.0)   | 530                                   | 26.6 ± 9.1 (13.0)  |
| Rome                                 | 914                                    | 16.3 ± 6.0 (7.8)   | 913                                       | 13.6 ± 6.5 (7.0)   | 914                                   | 31.4 ± 10.4 (11.7) |
| Barcelona                            | 1,389                                  | 22.0 ± 8.6 (10.5)  | 1,389                                     | 13.9 ± 10.3 (11.4) | 1,389                                 | 35.8 ± 14.9 (18.9) |
| Madrid                               | 813                                    | 16.8 ± 9.0 (10.2)  | 809                                       | 16.4 ± 9.3 (10.3)  | 812                                   | 33.1 ± 16.2 (18.8) |

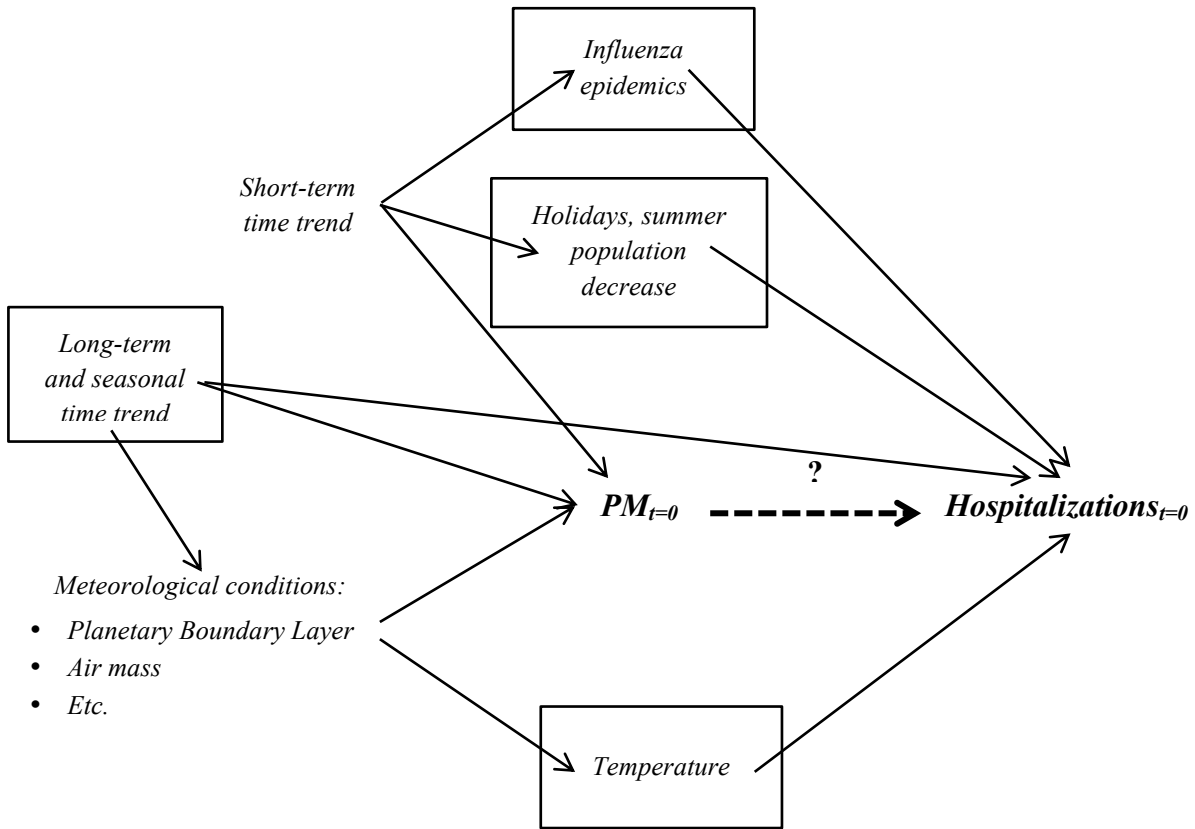

**Figure S1.** Directed acyclic graph (DAG) of the causal relationships between PM exposure, hospitalizations, and confounders. All variables are assumed at lag 0.

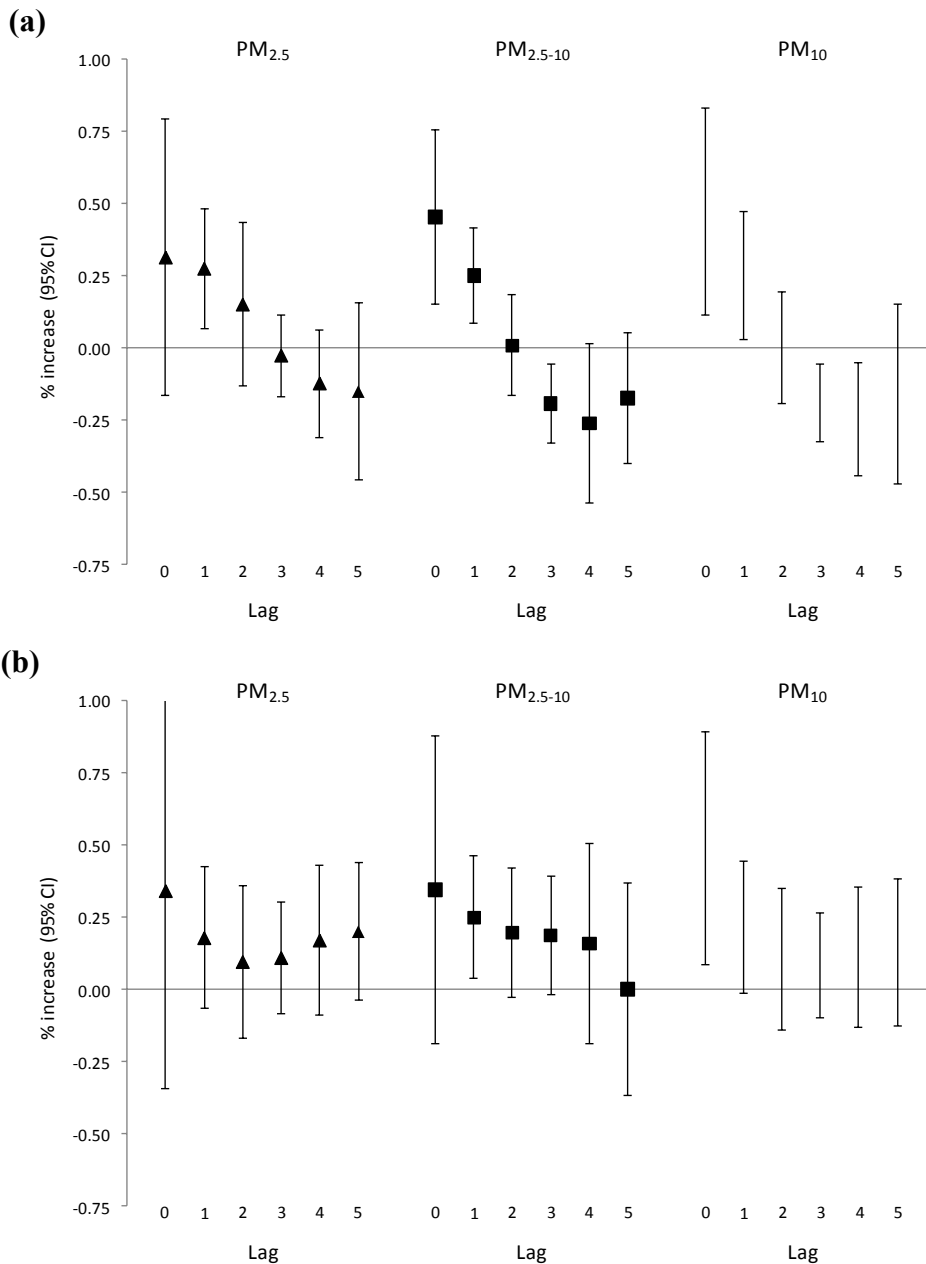

**Figure S2.** Association between PM and cardiovascular hospitalizations (a) and respiratory hospitalizations (b) from polynomial distributed lag models, lag 0 to 5: percentage increase of hospital admissions (95% CI) associated with increases of 10, 6.3 and 14.4  $\mu\text{g}/\text{m}^3$  for PM<sub>2.5</sub>, PM<sub>2.5-10</sub> and PM<sub>10</sub>, respectively. Models adjusted for time trend, high temperatures (lag 0-1), low temperatures (lag 1-6), holidays, summer population decrease, day of the week, and influenza epidemics.
